# Supplementary material for: Calcium and Superoxide-Mediated Pathways Converge to Induce Nitric Oxide-Dependent Apoptosis in Mycobacterium fortuitum-Infected Fish Macrophages
Source: PubMed Central journal article supplement (PMC4713470; doi:10.1371/journal.pone.0146554), 2016-01-11
Supplement: pone.0146554.s001.pdf [file pone.0146554.s001.pdf]

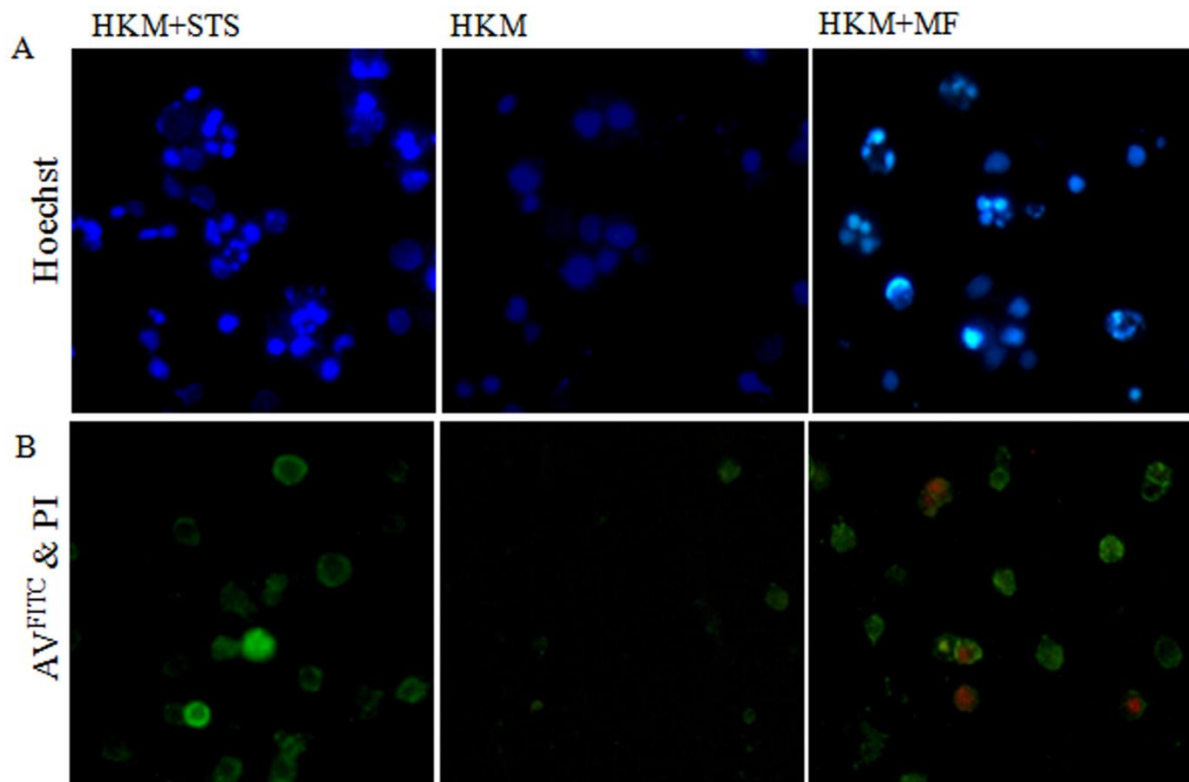

**S1 Fig. *M. fortuitum* induces HKM apoptosis.**

(A) Hoechst staining of STS treated (positive control), uninfected and *M. fortuitum*-infected HKM. (B) AV<sup>FITC</sup>/PI staining of STS treated (positive control), uninfected and *M. fortuitum*-infected HKM. The images were observed under fluorescence microscope ( $\times 40$ ). All the experiments were performed 24 h p.i. The images are representative of three independent experiments.
