# Supplementary material for: Calcium and Superoxide-Mediated Pathways Converge to Induce Nitric Oxide-Dependent Apoptosis in Mycobacterium fortuitum-Infected Fish Macrophages
Source: PubMed Central journal article supplement (PMC4713470; doi:10.1371/journal.pone.0146554), 2016-01-11
Supplement: pone.0146554.s003.pdf [file pone.0146554.s003.pdf]

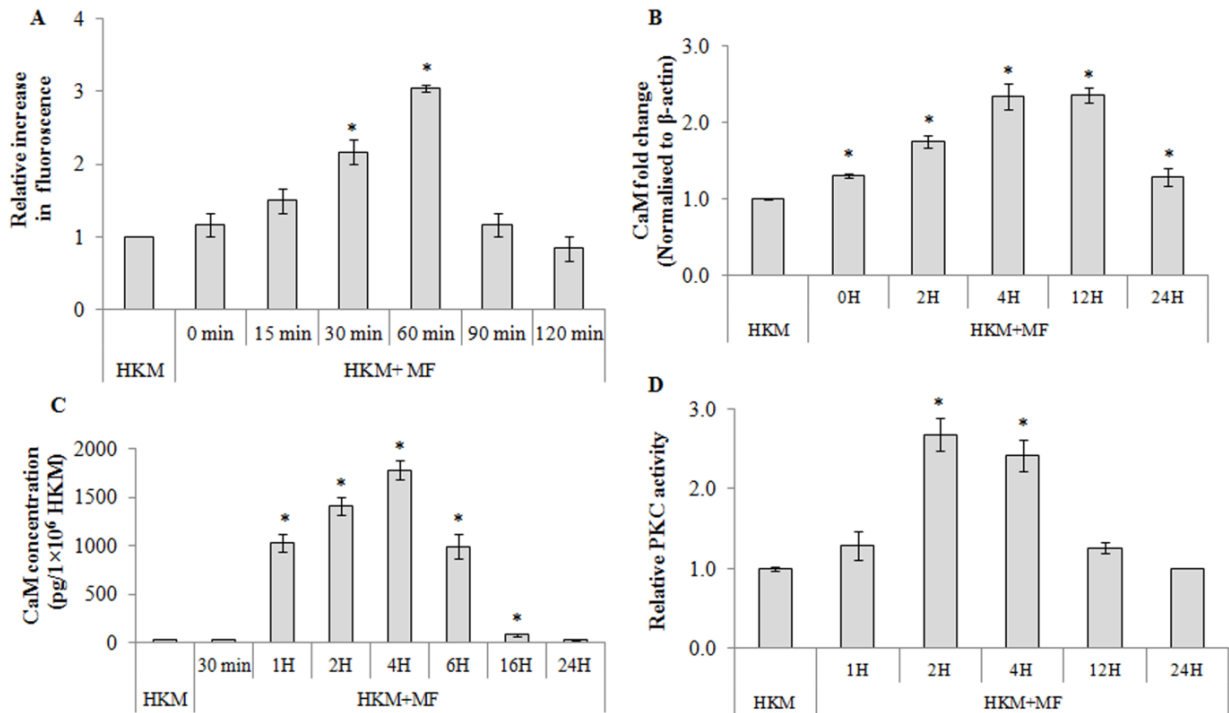

**S3 Fig. *M. fortuitum* increases cytosolic  $Ca^{+2}$  leading to the activation of CaM and PKC.**

(A) HKM uninfected or infected with *M. fortuitum* and at indicated time of infection the cytosolic  $Ca^{+2}$  level was quantified using Fluo-4/AM. HKM uninfected or infected with *M. fortuitum* and at indicated time p.i. the CaM expression was measured at (B) mRNA level and (C) protein level. (D) HKM uninfected or infected with *M. fortuitum* and at indicated time p.i. PKC activity was measured. Vertical bars represent mean  $\pm$  SE (n=3). \* $P < 0.05$ , compared to HKM. HKM, control head kidney macrophage; HKM+MF, HKM infected with *M. fortuitum*.
