# Supplementary material for: Calcium and Superoxide-Mediated Pathways Converge to Induce Nitric Oxide-Dependent Apoptosis in Mycobacterium fortuitum-Infected Fish Macrophages
Source: PubMed Central journal article supplement (PMC4713470; doi:10.1371/journal.pone.0146554), 2016-01-11
Supplement: pone.0146554.s004.pdf [file pone.0146554.s004.pdf]

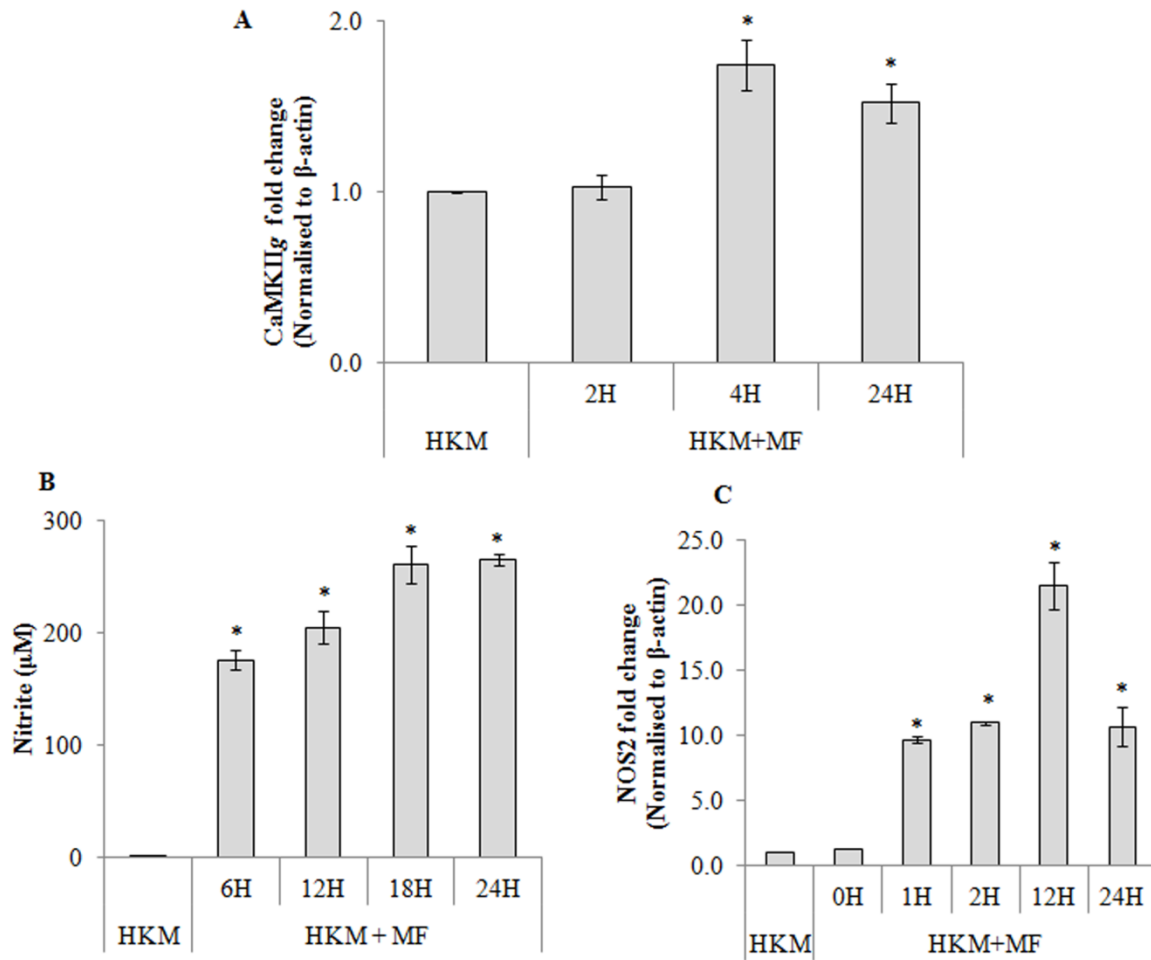

**S4 Fig. *M. fortuitum* induces the over-expression of CaMKIIg and NOS2/NO in infected HKM**

HKM uninfected or infected with *M. fortuitum* and at indicated time p.i. (A) CaMKIIg mRNA expression (B) NO release and (C) NOS2 mRNA expression were measured. Vertical bars represent mean  $\pm$  SE (n=3). \* $P$ <0.05, compared to HKM. HKM, control head kidney macrophage; HKM+MF, HKM infected with *M. fortuitum*.
